# Supplementary material
Source: publisher site journal article supplement (https://neotropical.pensoft.net/article/60579/download/suppl/31/)
Supplement: Supplementary file 1

## Sheet: Plan1
Basin ecoregion	Piratinim river basin streams	Stretches*	Geographical coordinates	Altitude (m)
Upper	Chuní	U	28º43’30”S 54º12’15”W	310
		I	28º40’10”S 54º21’09”W	240
		D	28º39’32”S 54º25’27”W	200
	Itú	U	28º47’18”S 54º12’09”W	330
		I	28º44’53”S 54º16’37”W	280
		D	28º41’42”S 54º22’40”W	240
Middle	Ximbocu	U	28º27’07”S 54º49’23”W	195
		I	28º28’08”S 54º57’13”W	155
		D	28º27’19”S 55º06’53”W	120
	Santana	U	28º30’37”S 54º43’48”W	185
		I	28º33’59”S 54º48’42”W	150
		D	28º34’50”S 54º49’03”W	150
Lower	Ivaí	U	28º04’35”S 55º20’59”W	105
		I	28º05’03”S 55º21’37”W	90
		D	28º05’20”S 55º22’45”W	80
	Guaracapa	U	28º10’38”S 55º10’44”W	145
		I	28º12’43”S 55º13’08”W	110
		D	28º14’19”S 55º15’46”W	100
*U=Upstream, I=Intermediate, D=Downstream
